# Supplementary material for: Copper–copper oxide coated nanofibrillar cellulose: a promising biomaterial
Source: Royal Society of Chemistry journal article supplement (doi:10.1039/c3ra42209g), 2013-01-01
Supplement: c3ra42209g.pdf [file c3ra42209g.pdf]

## Supplementary information

# Copper/copper oxide coated nanofibrillar cellulose- a promising biomaterial

**Shaswat Barua<sup>a</sup>, Gautam Das<sup>b</sup>, Lipika Aidew<sup>c</sup>, Alak K. Buragohain<sup>c</sup> and Niranjan Karak<sup>a\*</sup>**

<sup>a</sup> Advanced Polymer and Nanomaterial Laboratory, Department of Chemical Sciences, Tezpur University, Napaam-784028, Assam, India. Fax: +913712267006; Tel: +91-3712-267009; E-mail: karakniranjan@yahoo.com.

<sup>b</sup> *Department of Environment & Energy Engineering, Gachon University*

1342 Seongnam Daero, Seongnam, Gyeonggi, 461-701, Korea

<sup>c</sup> Department of Molecular Biology and Biotechnology, Tezpur University, Napaam-784028, Assam, India.

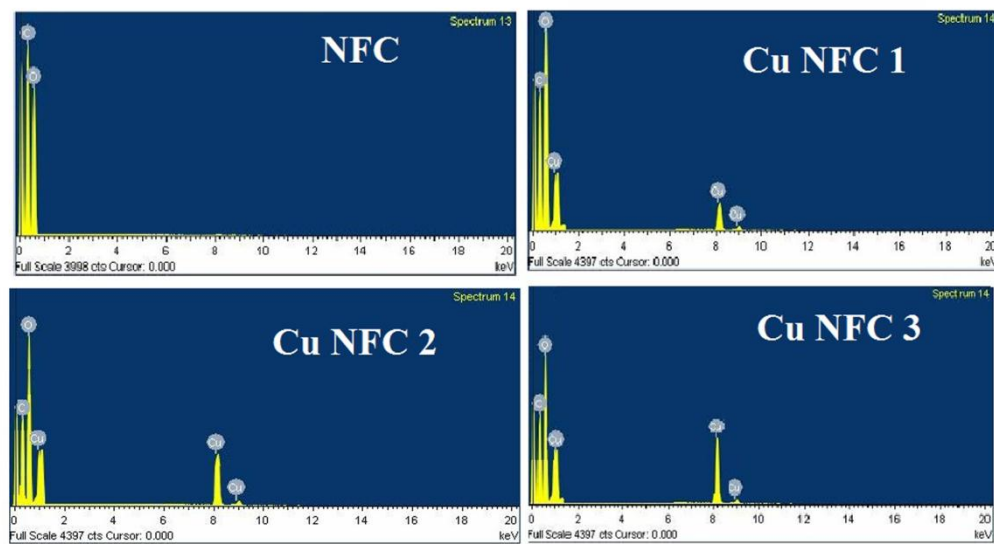

**Fig. S1** EDX images of NFC and Cu NFC

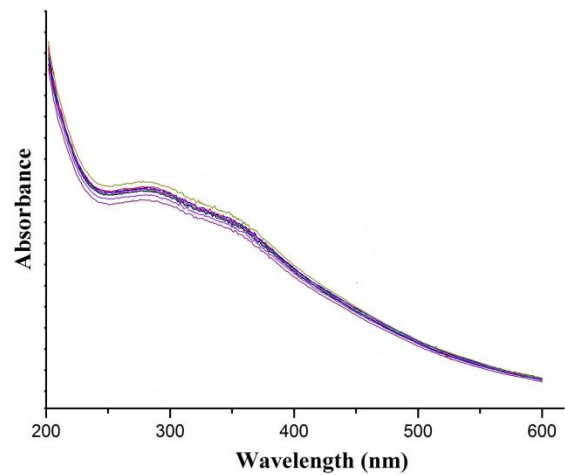

**Fig. S2** UV-visible spectra for Cu NFC
